# Supplementary material for: High performance opaque and semi-transparent organic solar cells with good tolerance to film thickness realized by a unique solid additive
Source: Royal Society of Chemistry journal article supplement (doi:10.1039/c9ta00164f), 2019-01-01
Supplement: c9ta00164f1.pdf [file c9ta00164f1.pdf]

## Supporting Information

### High Performance Opaque and Semitransparent Organic Solar Cells with Good Tolerance to Film Thickness Realized by a Unique Solid Additives

Xiaoyang Du, Xinrui Li, Hui Lin,\* Lei Zhou, Caijun Zheng, Silu Tao\*

*School of Optoelectronic Science and Engineering, University of Electronic Science and*

*Technology of China (UESTC), Chengdu 610054, P. R. China*

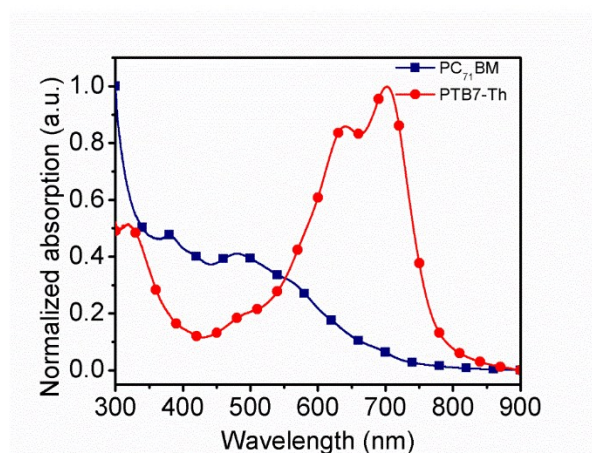

**Figure S1.** Normalized absorption spectra of PTB7-Th and PC<sub>71</sub>BM

**Table S1.** Photovoltaic parameters of control OSCs with different active layer thickness

| Thickness (nm) | V <sub>oc</sub> (V) | J <sub>sc</sub> (mA/cm <sup>2</sup> ) | FF (%) | PCE (max) <sup>b</sup> (%) |
|----------------|---------------------|---------------------------------------|--------|----------------------------|
| 300            | 0.766               | 14.21                                 | 50.71  | 5.52 (5.79)                |
| 200            | 0.775               | 18.92                                 | 59.76  | 8.87 (9.14)                |
| 120            | 0.783               | 18.26                                 | 65.49  | 9.26 (9.44)                |
| 60             | 0.796               | 13.38                                 | 68.16  | 7.25 (7.53)                |

<sup>b</sup> Statistical data obtained from 10 devices;

**Table S2.** Photovoltaic parameters of OSCs with different active areas

| Device                 | Area (mm <sup>2</sup> ) <sup>c</sup> | V <sub>oc</sub> (V) | J <sub>sc</sub> (mA/cm <sup>2</sup> ) | FF (%) | PCE (max) (%) |
|------------------------|--------------------------------------|---------------------|---------------------------------------|--------|---------------|
| Control <sup>a</sup>   | 2.3                                  | 0.783               | 18.26                                 | 65.49  | 9.26 (9.44)   |
|                        | 11.0                                 | 0.782               | 18.36                                 | 63.86  | 9.16 (9.28)   |
| Optimized <sup>b</sup> | 2.3                                  | 0.806               | 20.05                                 | 71.30  | 11.52 (11.64) |
|                        | 11.0                                 | 0.807               | 20.14                                 | 66.99  | 10.89 (11.15) |

<sup>a</sup> Device structure: ITO/ZnO/PTB7-Th:PC<sub>71</sub>BM:3%DIO/MoO<sub>3</sub>/Ag;  
<sup>b</sup> Device structure: ITO/ZnO/PTB7-Th:PC<sub>71</sub>BM:0.5%DDO: 1%DIO/MoO<sub>3</sub>/Ag;

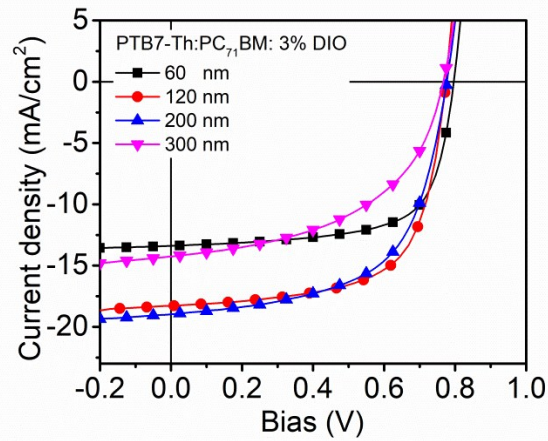

**Figure S2.** J-V curves of control device with different active layer thickness

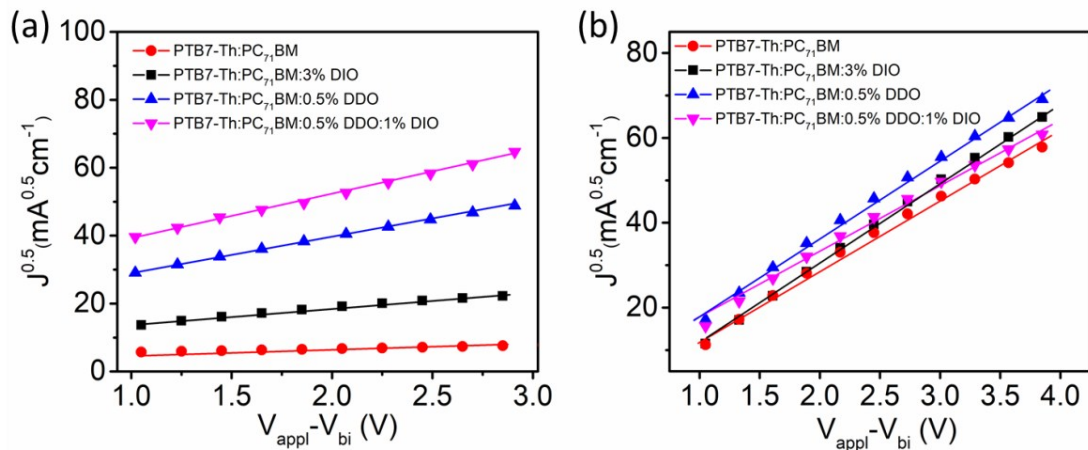

**Figure S3.** Fitting curves of hole (a) and electron (b) mobility of PTB7-Th: PC<sub>71</sub>BM, PTB7-Th: PC<sub>71</sub>BM: 3%DIO, PTB7-Th: PC<sub>71</sub>BM: 0.5%DDO and PTB7-Th: PC<sub>71</sub>BM: 0.5%DDO: 1%DIO films

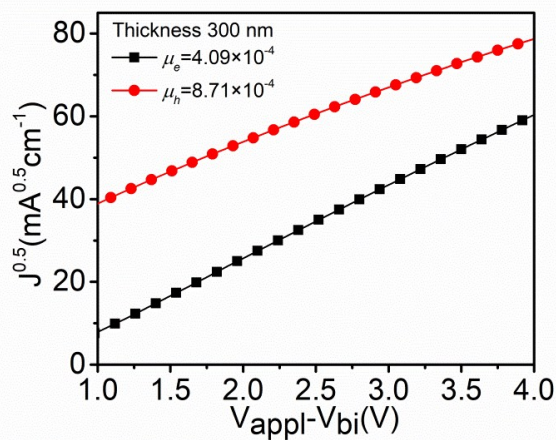

**Figure S4.** Fitting curves of hole and electron mobility of PTB7-Th: PC<sub>71</sub>BM: 0.5%DDO: 1%DIO film with 300 nm thickness

**Table S3.** Charge mobilities and balance factor of DDO contained and control devices in this work

| DDO      | DIO    | $\mu_h$ (cm <sup>2</sup> V <sup>-1</sup> S <sup>-1</sup> ) | $\mu_e$ (cm <sup>2</sup> V <sup>-1</sup> S <sup>-1</sup> ) | $\mu_h/\mu_e$ |
|----------|--------|------------------------------------------------------------|------------------------------------------------------------|---------------|
| w/o      | w/o    | $2.18 \times 10^{-5}$                                      | $4.34 \times 10^{-6}$                                      | 5.02          |
| w/o      | 3% DIO | $5.42 \times 10^{-4}$                                      | $3.05 \times 10^{-4}$                                      | 1.78          |
| 0.5% DDO | w/o    | $1.12 \times 10^{-3}$                                      | $9.56 \times 10^{-4}$                                      | 1.17          |
| 0.5% DDO | 1% DIO | $1.24 \times 10^{-3}$                                      | $1.05 \times 10^{-3}$                                      | 1.18          |

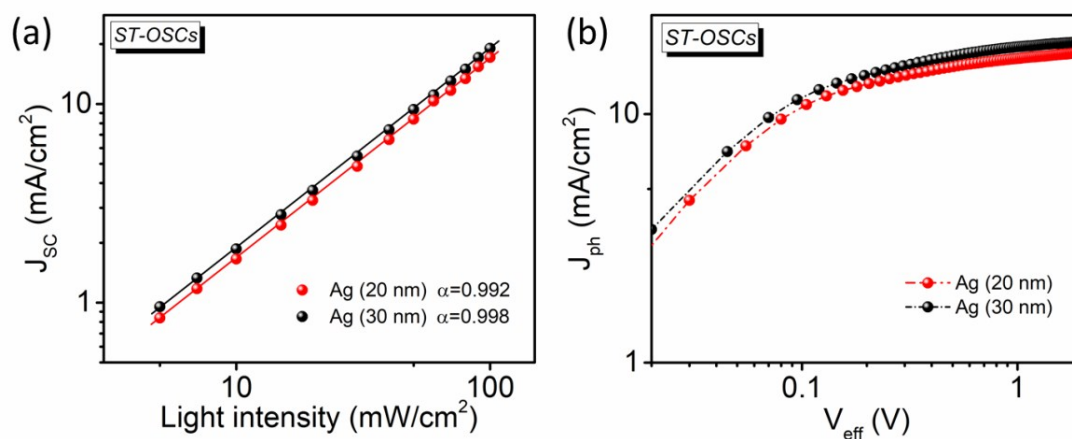

**Figure S5.** (a) Dependence of  $J_{sc}$  on light intensity (100 mW/cm<sup>2</sup> to 5 mW/cm<sup>2</sup>) and (b) photocurrent versus effective voltage of ST-OSCs with different Ag thickness
